# Supplementary material
Source: PubMed Central journal article supplement (PMC1308933)

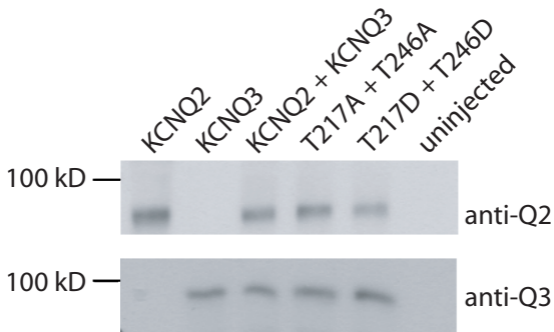

Supplement: pnas_0509122102_2.pdf [file pnas_0509122102_2.pdf]
